# Supplementary material for: Characterisation of Cooked Cheese Flavour: Non-Volatile Components
Source: MDPI journal article supplement (doi:10.3390/foods12203749), 2023-10-12
Supplement: s1 [file s1]

# **Characterisation of cooked cheese flavour: Part 1 – Non-volatile components**

## **Supplementary Information**

Rosa C. SULLIVAN <sup>1,2</sup>, Samantha NOTTAGE<sup>1</sup>, Fiyinfolu MAKINWA<sup>1</sup>, Maria ORUNA-CONCHA<sup>1</sup>, Colette C. FAGAN<sup>1</sup>, Jane K. PARKER<sup>1\*</sup>

<sup>1</sup> Department of Food and Nutritional Sciences, University of Reading, Whiteknights, Reading RG6 6DZ, UK

<sup>2</sup> Synergy Flavours Ltd, Hillbottom Road, Sands Industrial Estate, High Wycombe, HP124HJ, UK

\*Corresponding author: Jane K. Parker, Department of Food and Nutritional Sciences, University of Reading, Whiteknights, Reading RG6 6AP, UK.

Telephone: +44 (0) 118 378 7455

E-mail: [j.k.parker@reading.ac.uk](mailto:j.k.parker@reading.ac.uk)

Table S1 Quantitation of diketopiperazines (mg/kg) in cooked and raw cheeses (mean N=3).

|             | c-Val-Pro | c-Leu-Pro | c-Ala-Pro | c-Pro-Pro |
|-------------|-----------|-----------|-----------|-----------|
| HF Cooked   | 32.7      | 16.1      | 20.6      | 65.0      |
| HF Raw      | ND        | ND        | ND        | ND        |
| HF24 Cooked | 380       | 139       | 434       | 246       |
| HF24 Raw    | ND        | ND        | ND        | ND        |
| MF Cooked   | 44.0      | 27.7      | 26.2      | 68.8      |
| MF Raw      | ND        | ND        | ND        | ND        |
| LF Cooked   | 31.5      | 12.9      | 15.2      | 53.7      |
| LF Raw      | ND        | ND        | ND        | ND        |
| Mozz Cooked | 33.8      | 21.5      | ND        | ND        |
| Mozz Raw    | 7.4       | 5.5       | ND        | ND        |
| Parm Cooked | 153       | 91.3      | 160       | 32.7      |
| Parm Raw    | 6.8       | 0.0       | ND        | ND        |
| Ched Cooked | 513       | 273       | 403       | 57.7      |
| Ched Raw    | 3.5       | 0.0       | ND        | ND        |

ND indicates compounds which were not detected.

Table S2 Quantitation of amino acids (mg/kg) in cooked and raw cheeses (mean N=3)

|         | Ala |       | Gly |      | Val  |       | Leu  |       | Ile  |      | Thr |      | Ser |       | Pro |        | Asn |         |
|---------|-----|-------|-----|------|------|-------|------|-------|------|------|-----|------|-----|-------|-----|--------|-----|---------|
| 3M HF   | 77  | F     | 43  | E    | 218  | FG    | 484  | EFG   | 822  | EF   | 36  | EF   | 66  | FG    | 72  | EFG    | 187 | DEFGH   |
| 3M MF   | 75  | F     | 38  | E    | 262  | FG    | 480  | EFG   | 815  | EF   | 31  | EF   | 39  | G     | 63  | EFG    | 144 | EFGH    |
| 3M LF   | 290 | BCD   | 174 | B    | 573  | CDEF  | 935  | CDE   | 1591 | CDEF | 144 | CDE  | 149 | CDEFG | 252 | BCD    | 479 | ABC     |
| 6M HF   | 97  | F     | 43  | E    | 274  | EFG   | 635  | DEFG  | 1076 | DEF  | 55  | EF   | 79  | EFG   | 57  | FG     | 215 | CDEFGH  |
| 6M MF   | 91  | F     | 38  | E    | 264  | FG    | 608  | EFG   | 1031 | DEF  | 47  | EF   | 57  | FG    | 60  | EFG    | 208 | DEFGH   |
| 6M LF   | 185 | CDEF  | 90  | CDE  | 550  | CDEF  | 854  | CDEFG | 1447 | CDEF | 128 | CDEF | 149 | CDEFG | 170 | BCDEFG | 404 | ABCDE   |
| 9M HF   | 139 | DEF   | 71  | DE   | 399  | DEFG  | 863  | CDEFG | 614  | F    | 72  | EF   | 99  | EFG   | 109 | DEFG   | 345 | BCDEFG  |
| 9M MF   | 130 | EF    | 52  | E    | 382  | EFG   | 824  | CDEFG | 1005 | DEF  | 69  | EF   | 97  | EFG   | 106 | DEFG   | 299 | CDEFGH  |
| 9M LF   | 177 | CDEF  | 93  | BCDE | 518  | CDEFG | 829  | CDEFG | 1408 | CDEF | 125 | CDEF | 140 | CDEFG | 174 | BCDEFG | 397 | ABCDEF  |
| 12M HF  | 121 | EF    | 73  | DE   | 469  | DEFG  | 843  | CDEFG | 1431 | CDEF | 91  | DEF  | 108 | DEFG  | 153 | BCDEFG | 264 | CDEFGH  |
| 12M MF  | 156 | DEF   | 83  | CDE  | 451  | DEFG  | 902  | CDEF  | 1165 | DEF  | 96  | DEF  | 140 | CDEFG | 128 | CDEFG  | 325 | BCDEFGH |
| 12M LF  | 320 | BC    | 158 | BC   | 914  | BC    | 1472 | BC    | 2498 | ABCD | 228 | BC   | 260 | BCDE  | 303 | BC     | 577 | AB      |
| 18M HF  | 256 | BCDE  | 151 | BCD  | 803  | BCD   | 1455 | BC    | 2468 | ABCD | 202 | BCD  | 300 | BCD   | 222 | BCDEF  | 444 | ABCD    |
| 18M MF  | 217 | BCDEF | 107 | BCDE | 722  | BCDE  | 1360 | BCD   | 2307 | BCDE | 154 | BCDE | 242 | BCDEF | 173 | BCDEFG | 390 | ABCDEF  |
| 18M LF  | 567 | A     | 300 | A    | 1613 | A     | 2381 | A     | 4040 | A    | 469 | A    | 634 | A     | 564 | A      | 637 | A       |
| 24M HF  | 288 | BCD   | 184 | B    | 920  | BC    | 1727 | AB    | 2827 | ABC  | 229 | BC   | 322 | BC    | 235 | BCDE   | 415 | ABCDE   |
| 24M MF  | 345 | B     | 179 | B    | 1062 | B     | 1743 | AB    | 2960 | ABC  | 273 | B    | 410 | B     | 325 | B      | 431 | ABCDE   |
| 24M LF  | 543 | A     | 295 | A    | 1533 | A     | 2290 | A     | 3897 | AB   | 468 | A    | 640 | A     | 573 | A      | 289 | CDEFGH  |
| C 3M HF | 65  | F     | 33  | E    | 82   | G     | 218  | FG    | 372  | F    | 17  | F    | 32  | G     | 47  | FG     | 85  | GH      |
| C 3M MF | 64  | F     | 25  | E    | 73   | G     | 172  | G     | 293  | F    | 15  | F    | 24  | G     | 41  | G      | 73  | H       |
| C 3M LF | 99  | F     | 44  | E    | 133  | G     | 228  | FG    | 388  | F    | 37  | EF   | 50  | G     | 76  | DEFG   | 129 | FGH     |

Table S2 Cont

|         | Asp  |    | Met |    | Glu  |     | Phe  |         | Orn |      | Lys  |      | His |    | Tyr |      | Trp  |     |
|---------|------|----|-----|----|------|-----|------|---------|-----|------|------|------|-----|----|-----|------|------|-----|
| 3M HF   | 70   | C  | 25  | D  | 231  | DE  | 368  | GHIJ    | 76  | E    | 167  | DEF  | 27  | E  | 83  | FGH  | 4.2  | DE  |
| 3M MF   | 52   | C  | 45  | D  | 345  | DE  | 387  | FGHIJ   | 62  | E    | 107  | DEF  | 3.4 | E  | 75  | FGH  | 6.5  | DE  |
| 3M LF   | 179  | C  | 140 | CD | 1022 | CDE | 830  | CDEF    | 345 | BC   | 635  | BC   | 46  | DE | 179 | EFG  | 14.1 | CDE |
| 6M HF   | 82   | C  | 40  | D  | 347  | DE  | 391  | FGHIJ   | 102 | E    | 118  | DEF  | 0   | E  | 124 | FGH  | 1.2  | E   |
| 6M MF   | 90   | C  | 61  | D  | 415  | DE  | 385  | FGHIJ   | 42  | E    | 39   | F    | 0   | E  | 61  | GH   | 0    | E   |
| 6M LF   | 164  | C  | 100 | CD | 1042 | CDE | 646  | CDEFGHI | 135 | CDE  | 155  | DEF  | 0   | E  | 138 | FGH  | 6.4  | DE  |
| 9M HF   | 114  | C  | 148 | CD | 523  | DE  | 572  | DEFGHIJ | 74  | E    | 111  | DEF  | 0   | E  | 152 | FGH  | 6.4  | DE  |
| 9M MF   | 132  | C  | 89  | CD | 496  | DE  | 508  | EFGHIJ  | 104 | E    | 147  | DEF  | 0   | E  | 135 | FGH  | 2.1  | DE  |
| 9M LF   | 144  | C  | 169 | CD | 824  | CDE | 647  | CDEFGH  | 163 | BCDE | 202  | CDEF | 0   | E  | 160 | EFGH | 12.1 | CDE |
| 12M HF  | 127  | C  | 143 | CD | 1128 | CDE | 542  | EFGHIJ  | 125 | DE   | 237  | CDEF | 35  | E  | 220 | DEF  | 18.4 | CDE |
| 12M MF  | 139  | C  | 106 | CD | 610  | CDE | 561  | DEFGHIJ | 113 | DE   | 178  | DEF  | 23  | E  | 166 | EFGH | 7.2  | DE  |
| 12M LF  | 350  | BC | 359 | B  | 1891 | BC  | 1041 | BC      | 355 | B    | 490  | BCD  | 55  | DE | 303 | CDE  | 45.2 | BC  |
| 18M HF  | 290  | BC | 239 | BC | 1843 | BC  | 852  | CDE     | 225 | BCDE | 501  | BCD  | 181 | BC | 352 | BCD  | 34.7 | CD  |
| 18M MF  | 277  | BC | 142 | CD | 1416 | BCD | 762  | CDEFG   | 192 | BCDE | 462  | BCDE | 128 | CD | 302 | CDE  | 11.3 | DE  |
| 18M LF  | 981  | A  | 647 | A  | 3832 | A   | 1552 | A       | 647 | A    | 1219 | A    | 315 | A  | 502 | A    | 91.6 | A   |
| 24M HF  | 252  | BC | 373 | B  | 1873 | BC  | 1000 | BCD     | 199 | BCDE | 471  | BCDE | 228 | B  | 457 | AB   | 68.9 | AB  |
| 24M MF  | 559  | B  | 400 | B  | 2468 | B   | 1005 | BCD     | 320 | BCD  | 761  | B    | 225 | B  | 401 | ABC  | 44.8 | BC  |
| 24M LF  | 1260 | A  | 664 | A  | 4133 | A   | 1397 | AB      | 615 | A    | 1295 | A    | 369 | A  | 502 | A    | 96.8 | A   |
| C 3M HF | 42   | C  | 28  | D  | 68   | E   | 192  | IJ      | 45  | E    | 51   | F    | 4.5 | E  | 36  | GH   | 4.5  | DE  |
| C 3M MF | 34   | C  | 21  | D  | 113  | E   | 163  | J       | 59  | E    | 67   | EF   | 5.3 | E  | 29  | H    | 2.3  | DE  |
| C 3M LF | 60   | C  | 43  | D  | 206  | DE  | 226  | HIJ     | 81  | E    | 128  | DEF  | 17  | E  | 46  | GH   | 6.4  | DE  |

3M = 3 months aged, 6M = 6 months aged, 9M = 9 months aged, 12M = 12 months aged, 24M = 24 months aged, C 3M = cooked 3 months aged. LF, MF and HF = low, medium and high fat cheddar respectively. Letters A-J indicate significance based on Tukey's HSD: within each column, samples with the same letter were not significantly different ( $p=0.05$ ).

Table S3  $\gamma$  - Quantitation of  $\gamma$ -glutamyl peptides (mg/kg) in cooked and raw cheeses (mean N=3)

|         | $\gamma$ -Glu-Glu | $\gamma$ -Glu-Val | $\gamma$ -Glu-Met | $\gamma$ -Glu-Tyr | $\gamma$ -Glu-Leu | $\gamma$ -Glu-Phe |
|---------|-------------------|-------------------|-------------------|-------------------|-------------------|-------------------|
| 3M HF   | 0.000 e           | 0.000 e           | 2.1               | 0.000 f           | 0.014 i           | 0.005 f           |
| 3M MF   | 0.000 e           | 0.000 e           | 2.0               | 0.000 f           | 0.016 i           | 0.006 f           |
| 3M LF   | 0.004 de          | 0.001 e           | 11.6              | 0.000 f           | 0.026 i           | 0.011 f           |
| 6M HF   | 0.000 e           | 0.001 e           | 1.4               | 0.000 f           | 0.021 i           | 0.007 f           |
| 6M MF   | 0.000 e           | 0.002 e           | 1.9               | 0.000 f           | 0.024 i           | 0.007 f           |
| 6M LF   | 0.000 e           | 0.012 e           | 4.7               | 0.003 ef          | 0.043 hi          | 0.013 f           |
| 9M HF   | 0.000 e           | 0.003 e           | 2.7               | 0.000 f           | 0.022 i           | 0.007 f           |
| 9M MF   | 0.000 e           | 0.005 e           | 2.6               | 0.000 f           | 0.023 i           | 0.007 f           |
| 9M LF   | 0.000 e           | 0.012 e           | 7.0               | 0.002 f           | 0.046 ghi         | 0.013 f           |
| 12M HF  | 0.045 c           | 0.060 cd          | 82.1              | 0.038 d           | 0.245 ef          | 0.128 de          |
| 12M MF  | 0.000 e           | 0.016 de          | 44.5              | 0.010 ef          | 0.087 ghi         | 0.038 f           |
| 12M LF  | 0.000 e           | 0.037 cde         | 80.4              | 0.019 e           | 0.155 fgh         | 0.078 ef          |
| 18M HF  | 0.044 c           | 0.069 c           | 138.4             | 0.048 cd          | 0.319 de          | 0.173 cd          |
| 18M MF  | 0.019 d           | 0.039 cde         | 61.1              | 0.018 e           | 0.168 fg          | 0.073 ef          |
| 18M LF  | 0.058 bc          | 0.115 b           | 218.4             | 0.055 bc          | 0.405 cd          | 0.235 c           |
| 24M HF  | 0.072 ab          | 0.122 b           | 260.3             | 0.095 a           | 0.577 b           | 0.318 b           |
| 24M MF  | 0.045 c           | 0.124 b           | 166.8             | 0.066 b           | 0.472 bc          | 0.238 c           |
| 24M LF  | 0.087 a           | 0.202 a           | 379.3             | 0.096 a           | 0.710 a           | 0.442 a           |
| C 3M LF | 0.000 e           | 0.000 e           | 3.6               | 0.000 f           | 0.011 i           | 0.004 f           |
| C 3M MF | 0.000 e           | 0.000 e           | 0.9               | 0.000 f           | 0.009 i           | 0.004 f           |
| C 3M HF | 0.000 e           | 0.000 e           | 0.7               | 0.000 f           | 0.008 i           | 0.003 f           |

3M = 3 months aged, 6M = 6 months aged, 9M = 9 months aged, 12M = 12 months aged, 24M = 24 months aged, C 3M = cooked 3 months aged. LF, MF and HF = low, medium and high fat cheddar respectively. Letters a- i indicate significance based on Tukey's HSD: within each column, samples with the same letter were not significantly different (p=0.05).

Table S4 Quantitation of sugars (mg/kg) in cooked and raw cheeses (mean N=3).

|                   | Lactose |    | Glucose |    | Galactose |   |
|-------------------|---------|----|---------|----|-----------|---|
| Cheddar Cooked    | 0.19    | d  | nd      | c  | 0.001     | c |
| Cheddar Raw       | nd      | d  | nd      | c  | nd        | c |
| HF Cooked         | 28.8    | cd | 0.025   | c  | 0.24      | c |
| HF Raw            | 53.1    | bc | 0.09    | b  | 0.37      | c |
| LF Cooked         | 1.31    | d  | nd      | c  | 0.07      | c |
| LF Raw            | 1.23    | d  | nd      | c  | 0.16      | c |
| MF Cooked         | 7.24    | d  | 0.12    | ab | 0.46      | c |
| MF Raw            | 7.96    | d  | 0.14    | ab | 0.45      | c |
| Mozzarella Cooked | 66.7    | d  | nd      | c  | 18.34     | b |
| Mozzarella Raw    | 157     | a  | nd      | c  | 40.00     | a |
| Parmesan Cooked   | 0.06    | d  | nd      | c  | nd        | c |
| Parmesan Raw      | 0.00    | d  | 0.016   | c  | 0.002     | c |

Letters a-d indicate significance based on Tukey's HSD: within each column, samples with the same letter were not significantly different (p=0.05).

Table S5 Quantitation of organic acid (mg/kg) in cooked and raw cheeses (mean N=3).

|                   | Citric acid |     | Malic Acid |      | Lactic acid |     | Acetic acid |    | Propanoic acid |    |
|-------------------|-------------|-----|------------|------|-------------|-----|-------------|----|----------------|----|
| Raw Cheddar       | 10.4        | b   | 32.2       | a    | 448         | a   | 49.3        | ab | 126            | bc |
| Cooked Cheddar    | 6.03        | bcd | 3.64       | def  | 362         | abc | 83.2        | a  | 368            | bc |
| Raw Parmesan      | 1.56        | d   | 3.07       | ef   | 291         | abc | 47.7        | b  | 476            | b  |
| Cooked Parmesan   | 2.08        | d   | 4.39       | cdef | 346         | abc | 45.0        | b  | 1625           | a  |
| Raw Mozzarella    | 9.26        | bcd | 13.9       | b    | 74          | d   | 39.3        | b  | 2.31           | c  |
| Cooked Mozzarella | 16.82       | a   | 1.45       | f    | 88          | d   | 36.8        | b  | 2.73           | c  |
| Raw LF            | 4.34        | bcd | 2.03       | ef   | 198         | cd  | 35.0        | b  | 20.4           | c  |
| Cooked LF         | 3.50        | cd  | 4.66       | cdef | 366         | abc | 48.1        | b  | 50.8           | c  |
| Raw MF            | 3.16        | cd  | 6.78       | cde  | 280         | abc | 31.4        | b  | 16.2           | c  |
| Cooked MF         | 5.02        | bcd | 8.64       | c    | 406         | abc | 59.3        | ab | 47.7           | c  |
| Raw HF            | 2.54        | d   | 6.62       | cde  | 237         | bcd | 27.4        | b  | 10.9           | c  |
| Cooked HF         | 6.13        | bcd | 7.90       | cd   | 379         | ab  | 44.9        | b  | 56.2           | c  |

Letters a-f indicate significance based on Tukey's HSD: within each column, samples with the same letter were not significantly different (p=0.05).

ND indicates compounds which were not detected.
